# Supplementary material
Source: PubMed Central journal article supplement (PMC4019174)
Supplement: IAI.01599-13_zii999090687so1.pdf [file IAI.01599-13_zii999090687so1.pdf]

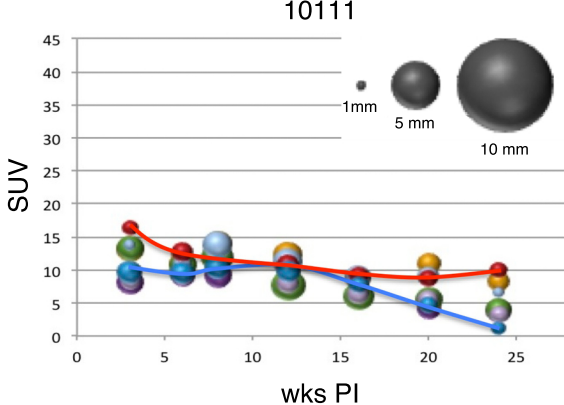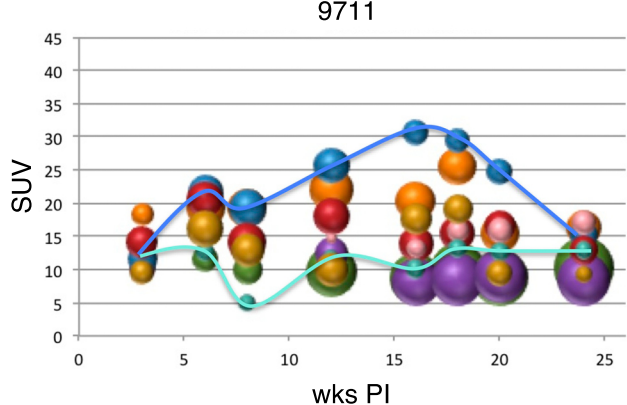

**Figure S1. Granulomas are dynamic and independent during the course of infection.**

Granulomas (represented as spheres) are shown in 2 animals (10111 and 9711) over time. The red and blue lines in 10111 show the trajectory of metabolic activity (measured as SUV) among two different granulomas in the same lung lobe over time (PI= post infection). The blue granuloma decreases in SUV dramatically from 16 to 24 weeks post infection whereas a less dramatic reduction is seen in the red granuloma. In 9711, one granuloma (blue) increases in SUV between 12 and 16 weeks while the other granuloma (light blue) decreases in activity. Each sphere represents a granuloma in the same animal. The size of each sphere is relative to the size of the granuloma.
